# Supplementary material
Source: HighWire-hosted journal article supplement (https://bmjopen.bmj.com/content/10/6/e035555)
Supplement: inline-supplementary-material-1 [file inline-supplementary-material-1.pdf]

## Appendices

**Table S1 Long-term cure rates after Retro-MUS used for extrapolation**

| Scenario               | Time (years) | Cure rate | Source        | Scale parameter ( $\lambda$ ) | Shape parameter ( $\gamma$ ) |
|------------------------|--------------|-----------|---------------|-------------------------------|------------------------------|
| Base case analysis     | 1            | 84%       | Meta-analysis | 0.08799444                    | 0.4932644                    |
|                        | 2            | 78%       |               |                               |                              |
| Sensitivity analysis 1 | 1            | 85%       | (1)           | 0.1969761                     | 0.12368398                   |
|                        | 2            | 80%       |               |                               |                              |
| Sensitivity analysis 2 | 1            | 78%       | (2)           | 0.19391258                    | 0.1788069                    |
|                        | 13           | 67.5%     |               |                               |                              |

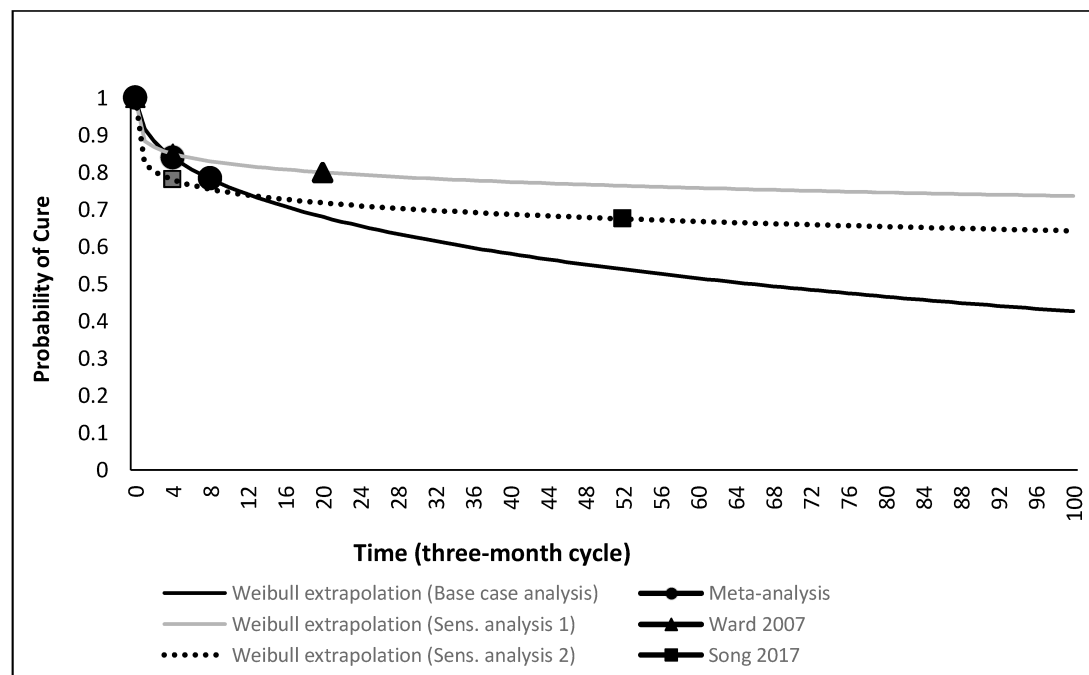

**Figure S1 Extrapolated long-term cure rates after Retro-MUS surgery. Note: each cycle is 3 months long**

**Table S2 Weibull hazard function parameters for estimation of long-term cure rates after Injectable agents**

| Weibull Parameters | Cure rate   |          |             |
|--------------------|-------------|----------|-------------|
|                    | Lower limit | Mean     | Upper limit |
| <b>Lambda</b>      | 1.020173    | 0.767078 | 0.548895    |
| <b>Gamma</b>       | 0.120006    | 0.137820 | 0.166837    |

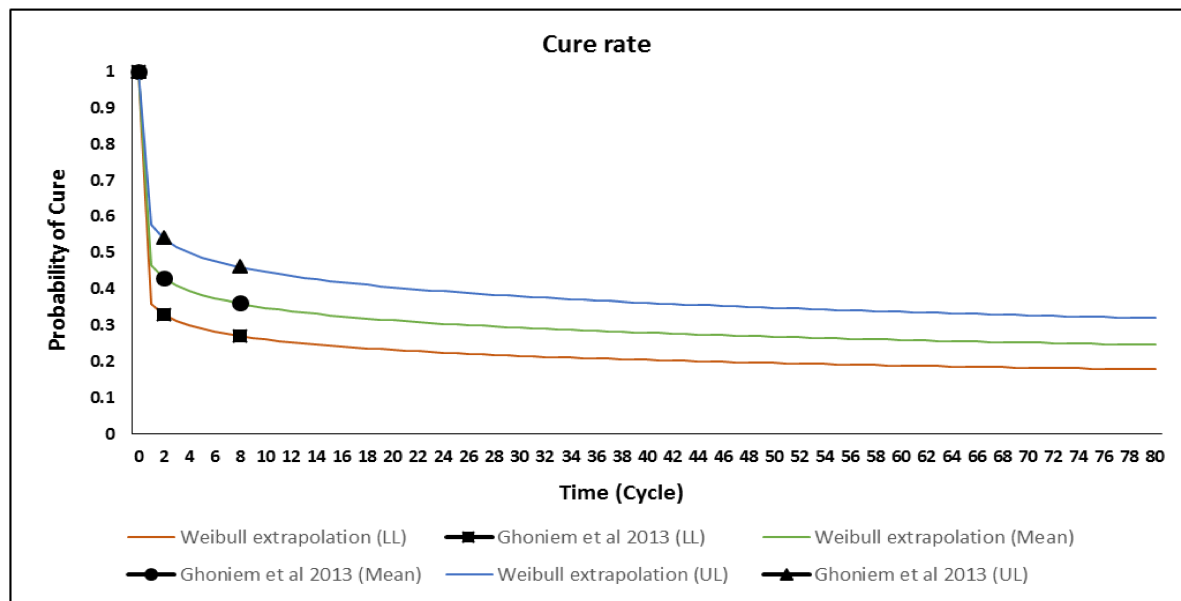

**Figure S2 Extrapolated long-term cure rates after peri-urethral injections (Injectable agents). Note that each cycle is 3 months long**

**Table S3 Complications incidence rates after different surgical treatments (results from random-effect meta-analysis)**

| Complication        | Infection      |              | De novo symptoms of urgency or urgency incontinence |              | Voiding difficulties including urinary retention |              | Bladder or urethral perforation |              | Tape/mesh erosion / extrusion/exposure |              | Short term pain |              | Persistent pain or discomfort |              |
|---------------------|----------------|--------------|-----------------------------------------------------|--------------|--------------------------------------------------|--------------|---------------------------------|--------------|----------------------------------------|--------------|-----------------|--------------|-------------------------------|--------------|
|                     | Posterior Mean | Posterior SD | Posterior Mean                                      | Posterior SD | Posterior Mean                                   | Posterior SD | Posterior Mean                  | Posterior SD | Posterior Mean                         | Posterior SD | Posterior Mean  | Posterior SD | Posterior Mean                | Posterior SD |
| Anterior repair     | NA             | NA           | 15.84%                                              | 11.83%       | 0.01%                                            | 0.15%        | NA                              | NA           | NA                                     | NA           | NA              | NA           | NA                            | NA           |
| Bladder neck needle | NA             | NA           | 8.14%                                               | 4.87%        | 1.67%                                            | 2.61%        | NA                              | NA           | NA                                     | NA           | 57.64%          | 30.08%       | NA                            | NA           |
| Open-colpo          | 24.33%         | 21.82%       | 5.78%                                               | 1.15%        | 3.00%                                            | 1.04%        | 1.02%                           | 0.50%        | 0.0%                                   | NA           | 20.94%          | 25.65%       | 0.15%                         | 2.58%        |
| Lap-colpo           | NA             | NA           | 8.38%                                               | 3.98%        | 6.32%                                            | 2.35%        | 2.10%                           | 1.22%        | 0.0%                                   | NA           | NA              | NA           | NA                            | NA           |
| Trad-sling          | 14.85%         | 12.49%       | 7.85%                                               | 3.23%        | 11.63%                                           | 3.60%        | 1.82%                           | 1.11%        | 0.17%                                  | 0.34%        | 28.99%          | 28.12%       | 7.00%                         | 8.98%        |
| Retro-MUS           | 3.91%          | 4.72%        | 4.30%                                               | 0.66%        | 6.75%                                            | 0.95%        | 4.89%                           | 0.50%        | 1.40%                                  | 0.31%        | 4.36%           | 1.14%        | 5.09%                         | 2.37%        |
| Transob-MUS         | 2.84%          | 1.03%        | 5.31%                                               | 0.51%        | 2.88%                                            | 0.44%        | 5.13%                           | 0.50%        | 2.08%                                  | 0.26%        | 7.04%           | 2.08%        | 4.93%                         | 1.22%        |
| Single incision     | 3.22%          | 1.20%        | 6.47%                                               | 0.81%        | 2.15%                                            | 0.45%        | 0.37%                           | 0.18%        | 2.38%                                  | 0.55%        | 4.54%           | 3.21%        | 1.28%                         | 1.39%        |
| Injectable agents   | 17.94%         | 24.59%       | 17.94%                                              | 24.59%       | 11.47%                                           | 20.70%       | NA                              | NA           | NA                                     | NA           | NA              | NA           | NA                            | NA           |

NA: Not available or applicable; Anterior repair: Anterior vaginal repair (anterior colporrhaphy); Bladder neck needle: Bladder neck needle suspensions; CrI: Credible interval; Lap-colpo: Laparoscopic retropubic colposuspension; Open-colpo: Open abdominal retropubic colposuspension; Trad-sling: Traditional suburethral retropubic sling procedures; MUS: Mid-urethral sling; Retro-MUS: Retropubic mid-urethral sling; Transob-MUS: Transoburator mid-urethral sling; Single incision: Single incision sling procedures (\*mini-slings)

Table S4 Costs inputs

| Resource use                                                               | Cost (£)                       | Source                          | HRG code                                                                        |
|----------------------------------------------------------------------------|--------------------------------|---------------------------------|---------------------------------------------------------------------------------|
| <b>Surgery cost</b>                                                        |                                |                                 |                                                                                 |
| Anterior repair                                                            | 2,254.72                       | NHS reference costs 2017/18 (3) | MA04C/D - Intermediate open, lower genital tract procedures-elective inpatient  |
| Bladder neck needle                                                        | 1,978.94                       | NHS reference costs 2017/18 (3) | LB26A/B - Intermediate endoscopic, prostate or bladder neck procedures-elective |
| Open-colpo                                                                 | 4,113.30                       | NHS reference costs 2017/18 (3) | LB59Z - Major, open or laparoscopic bladder neck procedures-elective inpatient  |
| Lap-colpo                                                                  | 4,113.30                       | NHS reference costs 2017/18 (3) | LB59Z - Major, open or laparoscopic bladder neck procedures-elective inpatient  |
| Trad-sling                                                                 | 2,131.88                       | NHS reference costs 2017/18 (3) | LB51A/B - Vaginal tape operations for urinary incontinence-elective inpatient   |
| Retro-MUS                                                                  | 1,550.29                       | NHS reference costs 2017/18 (3) | LB51A/B - Vaginal tape operations for urinary incontinence-day case             |
| Transob-MUS                                                                | 1,550.29                       | NHS reference costs 2017/18 (3) | LB51A/B - Vaginal tape operations for urinary incontinence-day case             |
| Single incision                                                            | 1,103.53                       | Boyers et al. 2013 (4)          | N/A                                                                             |
| Injectable agents                                                          | 1,930.49                       | Cody et al. 2003 (5)            | N/A                                                                             |
| <i>Additional costs associated with surgery</i>                            |                                |                                 |                                                                                 |
| Incontinence pads                                                          | 112.68 (3 month cost estimate) | NICE guidance document (6)      | N/A                                                                             |
| Urodynamic test                                                            | 164.38                         | NHS reference costs 2017/18 (3) | N/A                                                                             |
| Consultation pre-surgery (20 minute consultation with surgical consultant) | 48.78                          | PSSRU 2016 (7)                  | N/A                                                                             |
| Urine dipstick analysis                                                    | 4.18                           | NICE clinical guidelines (6)    | N/A                                                                             |
| Full blood count                                                           | 6.69                           | NICE clinical guidelines (6)    | N/A                                                                             |
| Paracetamol 500mg (AAH) x 32                                               | 0.17 (daily cost based on a    | BNF 2016 (8)                    | N/A                                                                             |
| Lactulose 10g/15ml (AAH) x 10                                              | 0.53 (daily cost based on a    | BNF 2016 (8)                    | N/A                                                                             |

| <b>Urge incontinence treatment costs</b> |                                |                                   |     |
|------------------------------------------|--------------------------------|-----------------------------------|-----|
| Bladder training                         | 103.73 (3 month cost estimate) | Appendices of NICE guidelines (6) | N/A |
| Band 6 hospital-based physiotherapist    | 47.72                          | PSSRU 2016 (7)                    | N/A |
| Oxybutynin 5mg (AAH) x 56                | 0.05 (daily cost based on a    | BNF 2016 (8)                      | N/A |
| Consultant-led non-admitted follow-up    | 106.05                         | NHS reference costs 2017/18 (3)   | N/A |
| Intermediate endoscopic bladder          | 1,029.78                       | NHS reference costs 2017/18 (3)   | N/A |
| Botulinum toxin 100 unit powder for      | 146.57                         | BNF 2016 (8)                      | N/A |
| <b>Adverse event treatment costs</b>     |                                |                                   |     |
| Co-amoxiclav 250/125mg (AAH) x 21        | 0.29 (daily cost based on a    | BNF 2016 (8)                      | N/A |
| Attention to suprapubic bladder catheter | 130.45                         | NHS reference costs 2017/18 (3)   | N/A |
| Self-catheterisation                     | 6.58 (daily cost based on 4    | NICE guidance document (6)        | N/A |
| Mesh excision or repair                  | 1,396.57                       | NHS reference costs 2017/18 (3)   | N/A |
| Aspirin 300mg (AAH) x 28                 | 0.42 (daily cost based on a    | BNF 2016 (8)                      | N/A |

**Table S5 Utility values for different health states and utility decrement associated with complications**

| <b>Health status</b>                               | <b>Value</b>             | <b>Source</b> | <b>Duration</b> |
|----------------------------------------------------|--------------------------|---------------|-----------------|
| SUI pre-treatment                                  | 0.78                     | (9)           | Variable        |
| Mixed pre-treatment                                | 0.78                     | (9)           | Variable        |
| Cured from SUI, and no urge urinary incontinence   | 0.85                     | (10)          | Variable        |
| Urge urinary incontinence                          | 0.74                     | (10)          | Variable        |
| Pure SUI re-treatment                              | 0.74                     | (10)          | Variable        |
| Mixed re-treatment                                 | 0.74                     | (10)          | Variable        |
| SUI failure of treatment (containment)             | 0.74                     | (10)          | Variable        |
| Mixed failure of treatment (containment)           | 0.74                     | (10)          | Variable        |
| <b>Utility decrement values for adverse events</b> |                          |               |                 |
| <b>Adverse event</b>                               | <b>Utility decrement</b> | <b>Source</b> | <b>Duration</b> |
| Infection                                          | - 0.19                   | (11)          | 2 weeks         |
| Voiding difficulties (long-term)                   | - 0.23                   | (11)          | 3 months        |
| Bladder/urethral perforation                       | - 0.08                   | (11)          | 2 weeks         |
| Tape/mesh exposure/erosion                         | - 0.25                   | (11)          | 3 months        |
| Short-term pain                                    | -0.25                    | (11)          | 2 weeks         |
| Persistent pain                                    | - 0.25                   | (11)          | 6 months        |

## Deterministic Sensitivity Analyses Results

**Table S6 Results from deterministic sensitivity analyses-applying higher incidence rates of mesh complications after MUS procedures (lifetime time horizon)**

| Strategy                                                                                                                                                      | Cost (£) | Incremental cost (£) | QALY   | Incremental QALY | ICER (£)<br>( $\Delta$ Cost/ $\Delta$ QALY) | Probability cost-effective for different WTP thresholds (%) |         |
|---------------------------------------------------------------------------------------------------------------------------------------------------------------|----------|----------------------|--------|------------------|---------------------------------------------|-------------------------------------------------------------|---------|
|                                                                                                                                                               |          |                      |        |                  |                                             | £20,000                                                     | £30,000 |
| Base-case analysis – estimating the incidence rate of mesh complications after MUS procedures based on the data from trials                                   |          |                      |        |                  |                                             |                                                             |         |
| Retro-MUS                                                                                                                                                     | 8,666    |                      | 24.005 |                  |                                             | 51.0%                                                       | 48.0%   |
| Trad-sling                                                                                                                                                    | 9,071    | 405                  | 24.014 | 0.009            | 45,340                                      | 43.0%                                                       | 45.0%   |
| Transob-MUS                                                                                                                                                   | 10,174   | 1,103                | 23.435 | -0.580           | Dominated                                   | 0%                                                          | 0%      |
| Single incision sling                                                                                                                                         | 10,189   | 1,118                | 23.221 | -0.793           | Dominated                                   | 0%                                                          | 0%      |
| Injectable agents                                                                                                                                             | 10,292   | 1,221                | 23.512 | -0.503           | Dominated                                   | 0%                                                          | 0%      |
| Bladder neck needle                                                                                                                                           | 10,803   | 1,732                | 23.312 | -0.702           | Dominated                                   | 0%                                                          | 0%      |
| Open-colpo                                                                                                                                                    | 11,605   | 2,535                | 23.839 | -0.175           | Dominated                                   | 6.0%                                                        | 7.0%    |
| Anterior repair                                                                                                                                               | 11,609   | 2,539                | 23.168 | -0.847           | Dominated                                   | 0%                                                          | 0%      |
| Lap-colpo                                                                                                                                                     | 12,440   | 3,369                | 23.522 | -0.492           | Dominated                                   | 0%                                                          | 0%      |
| SA – estimating the incidence rate of mesh complications for Retropubic MUS (3.7%) and Transobturator MUS (2.8%) based on the data from Keltie and colleagues |          |                      |        |                  |                                             |                                                             |         |
| Retro-MUS                                                                                                                                                     | 8,702    |                      | 24.094 |                  |                                             | 50.0%                                                       | 50.0%   |
| Trad-sling                                                                                                                                                    | 9,087    | 385                  | 24.094 | -0.000           | Dominated                                   | 47.0%                                                       | 46.0%   |
| Transob-MUS                                                                                                                                                   | 10,208   | 1,506                | 23.511 | -0.583           | Dominated                                   | 0%                                                          | 0%      |
| Single incision sling                                                                                                                                         | 10,210   | 1,508                | 23.315 | -0.779           | Dominated                                   | 0%                                                          | 0%      |
| Injectable agents                                                                                                                                             | 10,278   | 1,576                | 23.550 | -0.544           | Dominated                                   | 0%                                                          | 0%      |
| Bladder neck needle                                                                                                                                           | 10,814   | 2,112                | 23.385 | -0.710           | Dominated                                   | 0%                                                          | 0%      |
| Anterior repair                                                                                                                                               | 11,605   | 2,903                | 23.211 | -0.883           | Dominated                                   | 0%                                                          | 0%      |
| Open-colpo                                                                                                                                                    | 11,618   | 2,916                | 23.905 | -0.189           | Dominated                                   | 2.0%                                                        | 3.0%    |
| Lap-colpo                                                                                                                                                     | 12,439   | 3,737                | 23.629 | -0.465           | Dominated                                   | 1.0%                                                        | 1.0%    |
| SA – assuming 10% incidence rate of mesh complications after Retropubic MUS and Transobturator MUS                                                            |          |                      |        |                  |                                             |                                                             |         |
| Retro-MUS                                                                                                                                                     | 8,796    |                      | 23.976 |                  |                                             | 47.0%                                                       | 45.0%   |
| Trad-sling                                                                                                                                                    | 9,093    | 297                  | 23.988 | 0.013            | 23,783                                      | 50.0%                                                       | 50.0%   |
| Single incision sling                                                                                                                                         | 10,201   | 1,107                | 23.170 | -0.818           | Dominated                                   | 0%                                                          | 0%      |
| Injectable agents                                                                                                                                             | 10,293   | 1,200                | 23.490 | -0.498           | Dominated                                   | 0%                                                          | 0%      |

|                                                                                                    |        |       |        |        |           |       |       |
|----------------------------------------------------------------------------------------------------|--------|-------|--------|--------|-----------|-------|-------|
| Transob-MUS                                                                                        | 10,295 | 1,202 | 23.370 | -0.618 | Dominated | 0%    | 0%    |
| Bladder neck needle                                                                                | 10,804 | 1,711 | 23.307 | -0.681 | Dominated | 0%    | 0%    |
| Anterior repair                                                                                    | 11,606 | 2,513 | 23.122 | -0.866 | Dominated | 0%    | 0%    |
| Open-colpo                                                                                         | 11,618 | 2,524 | 23.826 | -0.162 | Dominated | 3.0%  | 5.0%  |
| Lap-colpo                                                                                          | 12,438 | 3,345 | 23.491 | -0.497 | Dominated | 0%    | 0%    |
| SA – assuming 20% incidence rate of mesh complications after Retropubic MUS and Transobturator MUS |        |       |        |        |           |       |       |
| Retro-MUS                                                                                          | 8,906  |       | 24.021 |        |           | 42.0% | 40.0% |
| Trad-sling                                                                                         | 9,098  | 192   | 24.090 | 0.069  | 2.777     | 50.0% | 49.0% |
| Single incision sling                                                                              | 10,200 | 1,102 | 23.317 | -0.773 | Dominated | 0%    | 0%    |
| Injectable agents                                                                                  | 10,284 | 1,186 | 23.572 | -0.519 | Dominated | 0%    | 0%    |
| Transob-MUS                                                                                        | 10,415 | 1,317 | 23.458 | -0.633 | Dominated | 0%    | 0%    |
| Bladder neck needle                                                                                | 10,806 | 1,708 | 23.417 | -0.673 | Dominated | 0%    | 0%    |
| Anterior repair                                                                                    | 11,617 | 2,519 | 23.258 | -0.833 | Dominated | 0%    | 0%    |
| Open-colpo                                                                                         | 11,623 | 2,525 | 23.944 | -0.147 | Dominated | 8.0%  | 11.0% |
| Lap-colpo                                                                                          | 12,440 | 3,342 | 23.653 | -0.437 | Dominated | 0%    | 0%    |

**Table S7 Results from deterministic sensitivity analyses-incorporating longer duration for persistent pain complication (lifetime time horizon)**

| Strategy                                                                                         | Cost (£) | Incremental cost (£) | QALY   | Incremental QALY | ICER (£) ( $\Delta$ Cost/ $\Delta$ QALY) | Probability cost-effective for different WTP thresholds (%) |         |
|--------------------------------------------------------------------------------------------------|----------|----------------------|--------|------------------|------------------------------------------|-------------------------------------------------------------|---------|
|                                                                                                  |          |                      |        |                  |                                          | £20,000                                                     | £30,000 |
| Base-case analysis- assuming that persistent pain complication will last on average for 6 months |          |                      |        |                  |                                          |                                                             |         |
| Retro-MUS                                                                                        | 8,666    |                      | 24.005 |                  |                                          | 51.0%                                                       | 48.0%   |
| Trad-sling                                                                                       | 9,071    | 405                  | 24.014 | 0.009            | 45,340                                   | 43.0%                                                       | 45.0%   |
| Transob-MUS                                                                                      | 10,174   | 1,103                | 23.435 | -0.580           | Dominated                                | 0%                                                          | 0%      |
| Single incision sling                                                                            | 10,189   | 1,118                | 23.221 | -0.793           | Dominated                                | 0%                                                          | 0%      |
| Injectable agents                                                                                | 10,292   | 1,221                | 23.512 | -0.503           | Dominated                                | 0%                                                          | 0%      |
| Bladder neck needle                                                                              | 10,803   | 1,732                | 23.312 | -0.702           | Dominated                                | 0%                                                          | 0%      |
| Open-colpo                                                                                       | 11,605   | 2,535                | 23.839 | -0.175           | Dominated                                | 6.0%                                                        | 7.0%    |
| Anterior repair                                                                                  | 11,609   | 2,539                | 23.168 | -0.847           | Dominated                                | 0%                                                          | 0%      |
| Lap-colpo                                                                                        | 12,440   | 3,369                | 23.522 | -0.492           | Dominated                                | 0%                                                          | 0%      |
| SA – assuming that persistent pain complication will last on average for 36 months               |          |                      |        |                  |                                          |                                                             |         |
| Retro-MUS                                                                                        | 8,662    |                      | 23.902 |                  |                                          | 39.0%                                                       | 35.0%   |



|                                                                                    |        |       |        |        |           |       |       |
|------------------------------------------------------------------------------------|--------|-------|--------|--------|-----------|-------|-------|
| Trad-sling                                                                         | 9,097  | 435   | 23.911 | 0.009  | 30,466    | 47.0% | 42.0% |
| Transob-MUS                                                                        | 10,174 | 1,077 | 23.304 | -0.607 | Dominated | 0%    | 0%    |
| Single incision sling                                                              | 10,194 | 1,097 | 23.182 | -0.729 | Dominated | 0%    | 0%    |
| Injectable agents                                                                  | 10,299 | 1,202 | 23.533 | -0.378 | Dominated | 0%    | 0%    |
| Bladder neck needle                                                                | 10,814 | 1,717 | 23.341 | -0.570 | Dominated | 0%    | 0%    |
| Open-colpo                                                                         | 11,593 | 2,496 | 23.842 | -0.069 | Dominated | 12.0% | 20.0% |
| Anterior repair                                                                    | 11,607 | 2,510 | 23.122 | -0.789 | Dominated | 0%    | 0%    |
| Lap-colpo                                                                          | 12,437 | 3,340 | 23.564 | -0.347 | Dominated | 2.0%  | 3.0%  |
| SA – assuming that persistent pain complication will last on average for 60 months |        |       |        |        |           |       |       |
| Retro-MUS                                                                          | 8,677  |       | 23.781 |        |           | 51.0% | 41.0% |
| Traditional sling                                                                  | 9,075  | 397   | 23.721 | -0.060 | Dominated | 25.0% | 24.0% |
| Single incision sling                                                              | 10,186 | 1,509 | 23.162 | -0.619 | Dominated | 0%    | 0%    |
| Transob-MUS                                                                        | 10,187 | 1,509 | 23.201 | -0.580 | Dominated | 0%    | 0%    |
| Injectable agents                                                                  | 10,283 | 1,606 | 23.474 | -0.307 | Dominated | 2.0%  | 2.0%  |
| Bladder neck needle                                                                | 10,806 | 2,129 | 23.303 | -0.478 | Dominated | 0%    | 0%    |
| Anterior repair                                                                    | 11,606 | 2,928 | 23.153 | -0.628 | Dominated | 0%    | 0%    |
| Open-colpo                                                                         | 11,614 | 2,937 | 23.843 | 0.062  | 53,948    | 22.0% | 33.0% |
| Lap-colpo                                                                          | 12,432 | 818   | 23.574 | -0.256 | Dominated | 0%    | 0%    |

**Table S8 Results from deterministic sensitivity analyses-incorporating higher incidence rate for persistent pain complication after MUS procedures (lifetime time horizon)**

| Strategy                                                                                                                            | Cost (£) | Incremental cost (£) | QALY   | Incremental QALY | ICER (£) ( $\Delta$ Cost/ $\Delta$ QALY) | Probability cost-effective for different WTP thresholds (%) |         |
|-------------------------------------------------------------------------------------------------------------------------------------|----------|----------------------|--------|------------------|------------------------------------------|-------------------------------------------------------------|---------|
|                                                                                                                                     |          |                      |        |                  |                                          | £20,000                                                     | £30,000 |
| Base-case analysis- assuming that incidence rate of persistent pain after Retropubic MUS and Transobturator MUS are 5.09% and 4.93% |          |                      |        |                  |                                          |                                                             |         |
| Retro-MUS                                                                                                                           | 8,666    |                      | 24.005 |                  |                                          | 51.0%                                                       | 48.0%   |
| Trad-sling                                                                                                                          | 9,071    | 405                  | 24.014 | 0.009            | 45,340                                   | 43.0%                                                       | 45.0%   |
| Transob-MUS                                                                                                                         | 10,174   | 1,103                | 23.435 | -0.580           | Dominated                                | 0%                                                          | 0%      |
| Single incision sling                                                                                                               | 10,189   | 1,118                | 23.221 | -0.793           | Dominated                                | 0%                                                          | 0%      |
| Injectable agents                                                                                                                   | 10,292   | 1,221                | 23.512 | -0.503           | Dominated                                | 0%                                                          | 0%      |
| Bladder neck needle suspensions                                                                                                     | 10,803   | 1,732                | 23.312 | -0.702           | Dominated                                | 0%                                                          | 0%      |
| Open-colpo                                                                                                                          | 11,605   | 2,535                | 23.839 | -0.175           | Dominated                                | 6.0%                                                        | 7.0%    |
| Anterior repair                                                                                                                     | 11,609   | 2,539                | 23.168 | -0.847           | Dominated                                | 0%                                                          | 0%      |

|                                                                                                         |        |       |        |        |           |       |       |
|---------------------------------------------------------------------------------------------------------|--------|-------|--------|--------|-----------|-------|-------|
| Lap-colpo                                                                                               | 12,440 | 3,369 | 23.522 | -0.492 | Dominated | 0%    | 0%    |
| SA – assuming that incidence rate of persistent pain after Retropubic MUS and Transobturator MUS is 10% |        |       |        |        |           |       |       |
| Retro-MUS                                                                                               | 8,695  |       | 24.072 |        |           | 40.0% | 39.0% |
| Trad-sling                                                                                              | 9,089  | 394   | 24.152 | 0.080  | 4,730     | 57.0% | 56.0% |
| Transob-MUS                                                                                             | 10,916 | 1,107 | 23.533 | -0.619 | Dominated | 0%    | 0%    |
| Single incision sling                                                                                   | 10,201 | 1,112 | 23.531 | -0.621 | Dominated | 0%    | 0%    |
| Injectable agents                                                                                       | 10,284 | 1,195 | 23.601 | -0.551 | Dominated | 0%    | 0%    |
| Bladder neck needle suspensions                                                                         | 10,812 | 1,723 | 23.471 | -0.681 | Dominated | 0%    | 0%    |
| Anterior repair                                                                                         | 11,610 | 2,521 | 23.274 | -0.878 | Dominated | 0%    | 0%    |
| Open-colpo                                                                                              | 11,620 | 2,531 | 23.972 | -0.180 | Dominated | 3.0%  | 5.0%  |
| Lap-colpo                                                                                               | 12,455 | 3,366 | 23.673 | -0.479 | Dominated | 0%    | 0%    |
| SA – assuming that incidence rate of persistent pain after Retropubic MUS and Transobturator MUS is 20% |        |       |        |        |           |       |       |
| Retro-MUS                                                                                               | 8,667  |       | 23.973 |        |           | 27.0% | 26.0% |
| Trad-sling                                                                                              | 9,079  | 412   | 24.084 | 0.111  | 3,590     | 64.0% | 63.0% |
| Single incision sling                                                                                   | 10,184 | 1,104 | 23.274 | -0.810 | Dominated | 0%    | 0%    |
| Transob-MUS                                                                                             | 10,184 | 1,105 | 23.432 | -0.652 | Dominated | 0%    | 0%    |
| Injectable agents                                                                                       | 10,261 | 1,182 | 23.553 | -0.531 | Dominated | 0%    | 0%    |
| Bladder neck needle suspensions                                                                         | 10,802 | 1,723 | 23.342 | -0.742 | Dominated | 0%    | 0%    |
| Anterior repair                                                                                         | 10,597 | 2,518 | 23.191 | -0.893 | Dominated | 0%    | 0%    |
| Open-colpo                                                                                              | 11,600 | 2,521 | 23.871 | -0.213 | Dominated | 9.0%  | 11.0% |
| Lap-colpo                                                                                               | 12,420 | 3,341 | 23.562 | -0.522 | Dominated | 0%    | 0%    |

**Table S9 Results from deterministic sensitivity analyses- applying higher incidence rates and longer duration for persistent pain after MUS procedures (lifetime time horizon)**

| Strategy                                                                                                                                                                                | Cost (£) | Incremental cost (£) | QALY   | Incremental QALY | ICER (£) ( $\Delta$ Cost/ $\Delta$ QALY) | Probability cost-effective for different WTP thresholds (%) |         |
|-----------------------------------------------------------------------------------------------------------------------------------------------------------------------------------------|----------|----------------------|--------|------------------|------------------------------------------|-------------------------------------------------------------|---------|
|                                                                                                                                                                                         |          |                      |        |                  |                                          | £20,000                                                     | £30,000 |
| Base-case analysis- assuming that incidence rate of persistent pain after Retropubic MUS and Transobturator MUS are 5.09% and 4.93% and average duration of persistent pain is 6 months |          |                      |        |                  |                                          |                                                             |         |
| Retro-MUS                                                                                                                                                                               | 8,666    |                      | 24.005 |                  |                                          | 51.0%                                                       | 48.0%   |
| Trad-sling                                                                                                                                                                              | 9,071    | 405                  | 24.014 | 0.009            | 45,340                                   | 43.0%                                                       | 45.0%   |
| Injectable agents                                                                                                                                                                       | 10,174   | 1,103                | 23.435 | -0.580           | Dominated                                | 0%                                                          | 0%      |
| Single incision sling                                                                                                                                                                   | 10,189   | 1,118                | 23.221 | -0.793           | Dominated                                | 0%                                                          | 0%      |

|                                                                                                                                                               |        |       |        |        |           |       |       |
|---------------------------------------------------------------------------------------------------------------------------------------------------------------|--------|-------|--------|--------|-----------|-------|-------|
| Transob-MUS                                                                                                                                                   | 10,292 | 1,221 | 23.512 | -0.503 | Dominated | 0%    | 0%    |
| Bladder neck needle                                                                                                                                           | 10,803 | 1,732 | 23.312 | -0.702 | Dominated | 0%    | 0%    |
| Open-colpo                                                                                                                                                    | 11,605 | 2,535 | 23.839 | -0.175 | Dominated | 6.0%  | 7.0%  |
| Anterior repair                                                                                                                                               | 11,609 | 2,539 | 23.168 | -0.847 | Dominated | 0%    | 0%    |
| Lap-colpo                                                                                                                                                     | 12,440 | 3,369 | 23.522 | -0.492 | Dominated | 0%    | 0%    |
| SA – assuming that incidence rate of persistent pain after Retropubic MUS and Transobturator MUS are 20% and average duration of persistent pain is 60 months |        |       |        |        |           |       |       |
| Retro-MUS                                                                                                                                                     | 8,688  |       | 23.131 |        |           | 0%    | 0%    |
| Trad-sling                                                                                                                                                    | 9,079  | 391   | 23.752 | 0.621  | 630       | 46.0% | 45.0% |
| Single incision sling                                                                                                                                         | 10,186 | 1,107 | 23.181 | -0.571 | Dominated | 1.0%  | 1.0%  |
| Transob-MUS                                                                                                                                                   | 10,198 | 1,119 | 22.523 | -1.229 | Dominated | 0%    | 0%    |
| Injectable agents                                                                                                                                             | 10,301 | 1,222 | 23.511 | -0.241 | Dominated | 11.0% | 10.0% |
| Bladder neck needle                                                                                                                                           | 10,817 | 1,738 | 23.341 | -0.411 | Dominated | 0%    | 0%    |
| Open-colpo                                                                                                                                                    | 11,599 | 2,520 | 23.834 | 0.082  | 30,319    | 39.0% | 39.0% |
| Anterior repair                                                                                                                                               | 11,607 | 8     | 23.153 | -0.681 | Dominated | 0%    | 0%    |
| Lap-colpo                                                                                                                                                     | 12,432 | 833   | 23.552 | -0.282 | Dominated | 3.0%  | 5.0%  |

**Table S10 Results from deterministic sensitivity analyses-applying different values for short and long term cure rates after retropubic MUS (lifetime time horizon)**

| Strategy                                                                                                                           | Cost (£) | Incremental cost (£) | QALY   | Incremental QALY | ICER (£)<br>( $\Delta$ Cost/ $\Delta$ QALY) | Probability cost-effective for different |         |
|------------------------------------------------------------------------------------------------------------------------------------|----------|----------------------|--------|------------------|---------------------------------------------|------------------------------------------|---------|
|                                                                                                                                    |          |                      |        |                  |                                             | £20,000                                  | £30,000 |
| Base-case analysis – applying estimated mean values from the meta-analysis for short and long-term cure rates after Retropubic MUS |          |                      |        |                  |                                             |                                          |         |
| Retro-MUS                                                                                                                          | 8,666    |                      | 24.005 |                  |                                             | 51.0%                                    | 48.0%   |
| Trad-sling                                                                                                                         | 9,071    | 405                  | 24.014 | 0.009            | 45,340                                      | 43.0%                                    | 45.0%   |
| Transob-MUS                                                                                                                        | 10,174   | 1,103                | 23.435 | -0.580           | Dominated                                   | 0%                                       | 0%      |
| Single incision sling                                                                                                              | 10,189   | 1,118                | 23.221 | -0.793           | Dominated                                   | 0%                                       | 0%      |
| Injectable agents                                                                                                                  | 10,292   | 1,221                | 23.512 | -0.503           | Dominated                                   | 0%                                       | 0%      |
| Bladder neck needle                                                                                                                | 10,803   | 1,732                | 23.312 | -0.702           | Dominated                                   | 0%                                       | 0%      |
| Open-colpo                                                                                                                         | 11,605   | 2,535                | 23.839 | -0.175           | Dominated                                   | 6.0%                                     | 7.0%    |
| Anterior repair                                                                                                                    | 11,609   | 2,539                | 23.168 | -0.847           | Dominated                                   | 0%                                       | 0%      |
| Lap-colpo                                                                                                                          | 12,440   | 3,369                | 23.522 | -0.492           | Dominated                                   | 0%                                       | 0%      |
| SA – applying values from Ward and colleagues,(1) for short and long-term cure rates after Retropubic MUS                          |          |                      |        |                  |                                             |                                          |         |

|                                                                                                         |        |       |        |        |           |       |       |
|---------------------------------------------------------------------------------------------------------|--------|-------|--------|--------|-----------|-------|-------|
| Retro-MUS                                                                                               | 7,848  |       | 24.123 |        |           | 97.0% | 95.0% |
| Trad-sling                                                                                              | 9,195  | 1,347 | 23.682 | -0.441 | Dominated | 1.0%  | 2.0%  |
| Transob-MUS                                                                                             | 10,111 | 2,263 | 23.222 | -0.901 | Dominated | 0%    | 0%    |
| Single incision sling                                                                                   | 10,176 | 2,328 | 23.161 | -0.962 | Dominated | 0%    | 0%    |
| Injectable agents                                                                                       | 10,290 | 2,442 | 23.484 | -0.639 | Dominated | 0%    | 0%    |
| Bladder neck needle                                                                                     | 10,831 | 2,983 | 23.304 | -0.819 | Dominated | 0%    | 0%    |
| Anterior repair                                                                                         | 11,599 | 3,751 | 23.131 | -0.992 | Dominated | 0%    | 0%    |
| Open-colpo                                                                                              | 11,761 | 3,914 | 23.751 | -0.372 | Dominated | 2.0%  | 3.0%  |
| Lap-colpo                                                                                               | 12,467 | 4,619 | 23.513 | -0.610 | Dominated | 0%    | 0%    |
| SA – applying data from Song and colleagues,(2) for short and long-term cure rates after Retropubic MUS |        |       |        |        |           |       |       |
| Retro-MUS                                                                                               | 8,107  |       | 24.014 |        |           | 91.0% | 87.0% |
| Trad-sling                                                                                              | 9,235  | 1,128 | 23.674 | -0.340 | Dominated | 4.0%  | 4.0%  |
| Transob-MUS                                                                                             | 10,160 | 2,053 | 23.182 | -0.832 | Dominated | 0%    | 0%    |
| Single incision sling                                                                                   | 10,204 | 2,097 | 23.143 | -0.872 | Dominated | 0%    | 0%    |
| Injectable agents                                                                                       | 10,288 | 2,181 | 23.481 | -0.533 | Dominated | 0%    | 0%    |
| Bladder neck needle                                                                                     | 10,830 | 2,722 | 23.291 | -0.723 | Dominated | 0%    | 0%    |
| Anterior repair                                                                                         | 10,611 | 3,504 | 23.122 | -0.892 | Dominated | 0%    | 0%    |
| Open-colpo                                                                                              | 11,794 | 3,686 | 23.731 | -0.283 | Dominated | 4.0%  | 8.0%  |
| Lap-colpo                                                                                               | 12,494 | 4,387 | 23.513 | -0.501 | Dominated | 1.0%  | 1.0%  |

## Value of Information Analysis Results

**Table S11 Results from Expected Value of Partial Perfect Information Analysis**

| <b>Parameters</b>                                                                                  | <b>Per person EVPPI per year (£)</b> | <b>EVPPI for UK per year (£)</b> |
|----------------------------------------------------------------------------------------------------|--------------------------------------|----------------------------------|
| Health utility values                                                                              | 168                                  | 2,520,000                        |
| Operation related mortality rates                                                                  | 60                                   | 900,000                          |
| Relative treatment effectiveness                                                                   | 1,395                                | 20,925,000                       |
| Combinations of parameters associated with all the complications                                   | 3,973                                | 59,595,000                       |
| Combinations of parameters associated with short-term and persistent pain                          | 430                                  | 6,450,000                        |
| Combinations of parameters associated with short-term and persistent pain and mesh erosion/removal | 1,873                                | 28,095,000                       |

## References

1. Ward KL, Hilton P. Tension-free vaginal tape versus colposuspension for primary urodynamic stress incontinence: 5-year follow up. *BJOG : an international journal of obstetrics and gynaecology*. 2008;115(2):226-33.
2. Song PH, Kwon DH, Ko YH, Jung HC. The Long-Term Outcomes of the Tension-free Vaginal Tape Procedure for Treatment of Female Stress Urinary Incontinence: Data from Minimum 13 Years of Follow-Up. *LUTS: Lower Urinary Tract Symptoms*. 2017;9(1):10-4.
3. Department of Health. Reference Costs 2017-182018.
4. Boyers D, Kilonzo M, Mostafa A, Abdel-Fattah M. Comparison of an adjustable anchored single-incision mini-sling, Ajust®, with a standard mid-urethral sling, TVT-OTM: a health economic evaluation. *BJU Int*. 2013;112(8):1169-77.
5. Cody J. Systematic review of the clinical effectiveness and cost-effectiveness of tension-free vaginal tape for treatment of urinary stress incontinence. 2003.
6. Urinary incontinence in women: management Clinical guideline [CG171] 2015 [Available from: <https://www.nice.org.uk/guidance/cg171>].
7. Curtis L, Burns A. Unit Costs of Health & Social Care 2016: The University of Kent; 2016.
8. British National Formulary. BNF Online [Available from: [https://www.medicinescomplete.com/mc/?utm\\_source=bnforg&utm\\_medium=homepage&utm\\_campaign=medicinescomplete](https://www.medicinescomplete.com/mc/?utm_source=bnforg&utm_medium=homepage&utm_campaign=medicinescomplete)].
9. Manca A, Sculpher MJ, Ward K, Hilton P. A cost-utility analysis of tension-free vaginal tape versus colposuspension for primary urodynamic stress incontinence. *BJOG : an international journal of obstetrics and gynaecology*. 2003;110(3):255-62.
10. Haywood KL, Garratt AM, Lall R, Smith JF, Lamb SE. EuroQol EQ-5D and condition-specific measures of health outcome in women with urinary incontinence: reliability, validity and responsiveness. *Qual Life Res*. 2008;17(3):475-83.
11. Shepherd JP, Lowder JL, Jones KA, Smith KJ. Retropubic and transobturator midurethral slings: a decision analysis to compare outcomes including efficacy and complications. *Int Urogynecol J Pelvic Floor Dysfunct*. 2010;21(7):787-93.
